1 **Title: Vulnerability to cavitation is linked to home climate precipitation across eight eucalypt species**

2  
3 David Coleman<sup>1,\*</sup> ([david.coleman@sydney.edu.au](mailto:david.coleman@sydney.edu.au))

4 Andrew Merchant<sup>1</sup> ([andrew.merchant@sydney.edu.au](mailto:andrew.merchant@sydney.edu.au))

5 William T. Salter<sup>1</sup> ([william.salter@sydney.edu.au](mailto:william.salter@sydney.edu.au))  
6

7 <sup>1</sup>School of Life and Environmental Sciences, Sydney Institute of Agriculture, The University of  
8 Sydney, Brownlow Hill, NSW 2570, Australia.

9 \* Corresponding author  
10

11 **Abstract**

12 Vulnerability to cavitation in leaves is the result of highly adaptive anatomical and physiological traits that can be linked  
13 to water availability in a species' climate of origin. Despite similar gross leaf morphology, eucalypt species are often  
14 confined to specific climate envelopes across the variable rainfall environments of Australia. In this study, we investigate  
15 how the progression of cavitation differs among eucalypts and whether this is related to other hydraulic and physical  
16 leaf traits. We used the Optical Visualisation technique to capture cavitation progression across the leaves of eight  
17 eucalypt species (*Angophora crassifolia*, *Corymbia tessellaris*, *Eucalyptus atrata*, *Eucalyptus grandis*, *Eucalyptus*  
18 *laevopinea*, *Eucalyptus longifolia*, *Eucalyptus macrandra*, *Eucalyptus tereticornis*) from a wide range of climates and  
19 grown in a common garden setting. Vulnerability to cavitation, represented by the leaf water potential required for 50%  
20 cavitation of leaf vessels, varied significantly among species (-3.48 MPa to -8.25 MPa) and correlated linearly with home  
21 climate precipitation and leaf SLA ( $R^2$  of 0.64 and 0.75, respectively). P12-P88, the range of water potentials between  
22 which 12% to 88% of cavitation occurs, was decoupled from P50 but also correlated with leaf SLA ( $R^2$  of 0.72). We  
23 suggest the magnitude of P12-P88 may be representative of a species' drought strategy – a large P12-P88 signifying  
24 leaves that exhibit drought tolerance (retention of leaves under drought conditions) and a small P12-P88 signifying  
25 drought avoidance (leaf shedding after a threshold of drought is reached). Our results agree with other studies that  
26 highlight these cavitation metrics as genetically fixed traits. Turgor loss point, on the other hand, may be more plastic, as  
27 evidenced by the low variability of this trait across these eucalypt species grown in a common garden environment.  
28 Further study will help to establish the SLA-related anatomical traits that impart cavitation resistance and to extend  
29 these conclusions to a greater number of species and home climates.

30 **Key words:** Cavitation, embolism, climate, *Eucalyptus*, hydraulics, leaf water relations, SLA, Optical Visualisation

31

## 32 **Introduction**

33 A primary driver of evolutionary adaption in land plants is water availability in the environment, leading to a wide  
34 diversity in hydraulic structure and function across plant species. Diversity is most apparent in leaves, which must  
35 maximise surface area to intercept light while minimising water loss to transpiration. As the site of evaporation between  
36 the plant and the atmosphere, leaves of land plants must also contend with more negative water potentials ( $\Psi_{\text{leaf}}$ ) at  
37 earlier stages in plant hydraulic stress than other organs (Scoffoni *et al.*, 2018). If adequate water is not available to  
38 replace that lost to transpiration, leaf tissues face damage due to desiccation and loss of function. Cavitation or  
39 embolism, a phase change from liquid water to gas within xylem conduits under high water tension, is the dominant  
40 mechanism by which desiccation-induced tissue damage spreads through a plant (Choat *et al.*, 2018). In leaves, this  
41 causes an interruption in the supply of water to the mesophyll (Sack and Holbrook, 2006). Although embolism repair is  
42 possible (Klein *et al.*, 2018), loss of hydraulic integrity in leaves is often associated with delayed or non-reversible  
43 damage following periods of hydraulic stress (Skelton *et al.*, 2017). The ability of plants to resist the process of cavitation  
44 and maintain hydraulic integrity in the leaf vein network dictates the survival of the leaf tissue and, ultimately, the  
45 productivity of the plant. Therefore, cavitation resistance of leaves under hydraulic stress is a key trait with which  
46 species can be compared (Brodribb *et al.*, 2016a).

47 There are general rules that apply to the behaviour of angiosperm vein networks under hydraulic stress. Conduits in  
48 large veins are the first to cavitate and appear to do so multiple times, suggesting redundancy in the hydraulic pathways  
49 connecting sections of the mesophyll (Brodribb *et al.*, 2016a). Redundancy in leaf vein networks imparts resilience to the  
50 system by providing alternate routes for water to reach distal parts of the mesophyll during hydraulic stress and acts as  
51 an insurance policy to prevent rapid and catastrophic failure of tissue structure. Therefore, gradual cavitation over larger  
52 ranges of  $\Psi_{\text{leaf}}$  suggests greater tolerance to hydraulic stress (Brodribb *et al.*, 2016a).

53 A tradeoff between efficiency and strength has been found to exist in the construction of plant xylem networks in leaves  
54 (Liu *et al.*, 2021; Grossiord *et al.*, 2020; Pritzkow *et al.*, 2019). Thinner, more numerous conduits have increased  
55 tolerance to cavitation than larger conduits but have a higher mass to flow area ratio, increasing the hydraulic resistance  
56 of flow through the leaf and costing the plant more in the tradeoff to carbon fixation and evaporative cooling (Santiago  
57 *et al.*, 2018; Klein *et al.*, 2018). In addition to vein traits, many other anatomical and physiological leaf traits are  
58 associated with cavitation resistance. Thicker leaves provide a buffer to rising tension inside xylem conduits with  
59 declining leaf water status, with larger outside-xylem water stores protecting against embolism (Scoffoni *et al.*, 2017a).  
60 Drought resistance traits, such as low turgor loss point (TLP), often cooccur with resistance to cavitation in leaf vein  
61 networks. The onset of leaf hydraulic dysfunction also corresponds with full stomatal closure in plants exposed to  
62 gradual drought treatment in some species (Johnson *et al.*, 2018; Li *et al.*, 2019). In scenarios of rapid leaf desiccation  
63 (hours rather than days or weeks), stomatal closure is thought to occur well before the leaf suffers significant damage (Li

54 *et al.*, 2019; Trueba *et al.*, 2019). However, Skelton *et al.* (2015) reported that some plants have small or negative  
55 differences between  $\Psi_{\text{leaf}}$  at stomatal closure and the leaf xylem cavitation threshold, the stomatal hydraulic safety  
56 margin.

57 In addition to leaf-level traits and physiological processes that influence cavitation resistance, leaves also operate in  
58 concert with the hydraulic status of the whole plant. In order to draw ecophysiological conclusions from cavitation  
59 resistance in leaves, it is essential to acknowledge differing plant survival strategies in the face of drought stress, such as  
60 the hydraulic vulnerability segmentation hypothesis (Tyree & Ewers, 1991). In many cases, xylem vessels in leaves have  
61 been shown to be more vulnerable to hydraulic decline than stems, evidenced by the high ratio of the water potential at  
62 50% stem xylem cavitation ( $P50_{\text{stem}}$ ) to leaf xylem cavitation ( $P50_{\text{leaf}}$ ), the safety margin of hydraulic segmentation  
63 (Pivovarov *et al.*, 2014a). Where this is the case, leaves can be seen to act as comparatively expendable "hydraulic  
64 fuses" during drought, acting to delay or prevent loss of sapwood conductivity as this is more critical to the survival of  
65 the plant. Interpreting  $P50_{\text{leaf}}$  in these species to be solely representative of the vulnerability of the whole plant to  
66 drought stress would not be accurate. Although this hydraulic segmentation hypothesis certainly applies to the leaves  
67 of some species, there appears to be a range of different degrees to which  $P50_{\text{leaf}}$  differs from  $P50_{\text{stem}}$  that correlate with  
68 climate and biome metrics, including many plants that possess negligible or even negative ratios in wetter, more humid  
69 environments (Zhu *et al.*, 2016). At the very least, leaf hydraulic vulnerability is critical to plant survival when we  
70 consider that leaf cavitation will lead to tissue death, which ultimately limits productivity (Pritzkow *et al.*, 2019).

71 Cavitation across leaf venation networks can be visualised and quantified using several techniques, including the use of  
72 cryo-scanning electron microscopy (Johnson *et al.*, 2009) and micro-CT reconstructions (Scoffoni *et al.*, 2017b) to map  
73 the formation of air spaces inside vessels (Scoffoni *et al.*, 2017b). However, these imaging techniques rely on expensive  
74 equipment and specialist expertise. Optical visualisation (OV), on the other hand, is a low-cost and easy-to-use  
75 alternative in which cavitation events can be detected from a sequence of standard photographic images of a drying  
76 leaf. Rapid, embolism-induced changes are distinguished via a difference in the transmission of light through the tissue  
77 in successive images (Brodrick *et al.*, 2016b). Coupling the OV technique with a measure of leaf hydraulic status allows  
78 for the construction of vulnerability curves, which describes a species' resistance to embolism. Hydraulic vulnerability  
79 curves show the percentage loss of conductivity (PLC) as a function of decreasing xylem pressure and can be used to  
80 extract metrics of vulnerability – various  $\Psi_{\text{leaf}}$  thresholds beyond which significant xylem embolism occurs (Venturas *et al.*  
81 *et al.*, 2017). The most commonly used parameter, P50 (the bulk leaf water potential at which 50% loss of conductivity has  
82 occurred), can be used to summarise the complex progression of cavitation propagation, with more negative P50  
83 indicating vein networks more resilient to hydraulic stress (Blackman *et al.*, 2017; Hartmann *et al.*, 2018). However, the  
84 characteristic sigmoidal shape of hydraulic vulnerability curves (Creek *et al.*, 2019) means other metrics such as P12 (a  
85 measure of the initiation of significant xylem embolism) and P88 (completion of xylem embolism) are also helpful to  
86 compare strategies to hydraulic stress across species. For example, species that initiate cavitation earlier in a desiccation

27 treatment than other species (higher P12) but fully cavitate later (lower P88) suggests a different drought strategy to  
28 leaves in which cavitation occurs over a narrow range of water potentials. We hypothesize that the P12-P88 range could  
29 be used as a new metric to define whether species tolerate drought (long and gradual cavitation progression starting at  
30 low water stress) or attempt to avoid it (rapid and complete cavitation progression at a particular threshold water  
31 stress).

32 Eucalypts are a group of woody angiosperms ideally suited to drawing ecophysiological links between the environment  
33 and leaf hydraulic traits (Merchant *et al.*, 2007). The term eucalypt refers to a grouping of species across three closely-  
34 related genera of the Myrtaceae family – *Eucalyptus*, *Corymbia* and *Angophora*. Across Australia, eucalypt species have  
35 adapted to a wide range of climates with varying levels of water availability while maintaining relatively similar gross leaf  
36 size and shape (Brooker and Nicolle, 2013). In fact, similar and flexible gross leaf morphology within and between  
37 species has prompted the scientific community to use microscopic venation patterns as a tool for differentiating species  
38 in these genera (Brooker and Nicolle, 2013). Therefore, it is possible that the pressure thresholds that hydraulic  
39 structures in leaves can withstand may contribute to confining species to a particular climate envelope (Blackman *et al.*,  
40 2012). Recent research has related the hydraulic vulnerability of multiple eucalypt species to their home climate (Li *et al.*,  
41 2019; Bourne *et al.*, 2017), including the safety margin of hydraulic segmentation (water potential at stomatal  
42 closure to P12) and the Hydroscape area (the region bounded by the predawn water potential ( $\Psi_{pd}$ ) and midday water  
43 potential ( $\Psi_{md}$ ) regression and 1:1 line on a  $\Psi_{pd}$  vs  $\Psi_{md}$  plot) (Li *et al.*, 2019). However, a detailed study of the spatial  
44 progression of leaf embolism and how this relates both to physical leaf properties and to home climate across eucalypt  
45 species could reveal new insights into the drivers and strategies employed to mitigate desiccation.

46 In this study, we measured the progression of cavitation in response to declining water status in leaves of eight eucalypt  
47 species from home climates spanning an extensive geographic range and different subgenera, grown in a common  
48 garden setting. We used the OV method (Brodribb *et al.*, 2016a) to observe the spatial and temporal dynamics of  
49 hydraulic vulnerability across the leaf. We quantified key cavitation metrics (including P50 and TLP) and measured other  
50 important hydraulic and physical leaf properties to determine the adaptive mechanisms underpinning leaf cavitation  
51 resistance across these eight species. Specifically, we aimed to investigate (i) whether the characteristics of embolism  
52 progression are consistent across these eucalypt species, (ii) whether cavitation metrics correlate with other leaf  
53 thresholds of hydraulic decline, such as TLP, and (iii) which leaf traits or home climate variables confer cavitation  
54 resistance across eucalypt species.

## 25 **Methods**

### 26 *Site characteristics*

27 Eight species of eucalypt were chosen for study encompassing a broad taxonomic scope, including representatives from  
28 the *Angophora*, *Corymbia* and *Eucalyptus* genera – *Angophora crassifolia*, *Corymbia tessellaris*, *Eucalyptus atrata*,  
29 *Eucalyptus grandis*, *Eucalyptus laevopinea*, *Eucalyptus longifolia*, *Eucalyptus macrandra* and *Eucalyptus tereticornis*.  
30 These species originated from a wide range of climates (Table 1). Of note is the range of mean annual temperature (13.2  
31 °C for *E. laevopinea* to 23.5 °C for *C. tessellaris*) and mean annual precipitation (503 mm for *E. macrandra* to 1335 mm  
32 for *E. grandis*) of seed collection locations.

33 All plant material was sourced between mid-June to mid-August 2020 from the Australian Botanic Garden, Mount  
34 Annan, NSW, Australia (34° 4'13"S, 150°46'12"E, elevation 150m) (See Supp. Figure 1 for map location). The site has a  
35 mean annual temperature of 16.5°C and mean annual precipitation of 780 mm. During the six months prior to the  
36 experiment, temperatures were close to the long-term average for this time of year (average daily maximum = 20-30°C,  
37 average daily minimum = 10-20°C) but rainfall was almost double the long-term average (pre-experiment = 566 mm,  
38 long-term average = 295 mm). Temperatures and rainfall during the experiment were similar to the long-term average,  
39 with daily average maximum and minimum temperatures of 17-18°C and 3-5°C, respectively, and ~100 mm rainfall over  
40 the 2.5 months. The soils in the Garden are dominated by well-drained Kurosols and Dermosols. Seed progeny data was  
41 provided by The Australian Botanic Garden (Table 1) (See Supp. Figure 1 for map location). Home climate data for  
42 species were sourced from the Atlas of Living Australia Spatial Portal (<http://spatial.ala.org.au/>; accessed 6 October  
43 2020).

### 44 *Sample collection*

45 Each morning of the experiment, one small branch (~ 30 cm) of adult foliage was cut from a tree using clean sanitised  
46 secateurs. Sampled branches were always situated on the light exposed, north or east-facing side of the tree. The  
47 branch was immediately recut underwater, covered, and transported (20 minutes) by car to a laboratory at the  
48 University of Sydney, Brownlow Hill, NSW. The branch was then placed in a dark cupboard to rehydrate, and leaf  
49 surfaces dried with a tissue, if necessary, until measurement (1.5 – 2 hours after initial cutting).

### 50 *Measurement of cavitation, water potential and hydraulic vulnerability metrics*

51 Progression of leaf vein cavitation (leaf hydraulic vulnerability) with declining  $\Psi_{\text{leaf}}$  was measured using the open-source  
52 optical visualisation technique (Brodribb *et al.*, 2016b). In the laboratory and over the course of the experiment, three to  
53 four healthy fully expanded leaves from different individual trees of each species were positioned and held in place by  
54 custom-built leaf clamps underneath a digital camera (Camera Module v2; Raspberry Pi Foundation, Cambridge, UK) and

55 macro-lens (Eschenbach 20x Magnifier; Prospectors, Sydney, Australia). Refer to [www.opensourceov.org](http://www.opensourceov.org) for a  
56 comprehensive description of the design. Leaf edges were taped to the surface of the clamp to avoid movement and  
57 shrinkage during the experiment. The water source to the branch was then removed and the leaf, still attached to the  
58 branch, was left to dry on the lab bench. Images of the leaf within the clamp were taken at 1 min intervals and stored on  
59 a Raspberry Pi computer (3B+; Raspberry Pi Foundation, Cambridge, UK). Leaf water potential ( $\Psi_{\text{leaf}}$ ) was monitored  
60 continuously during leaf desiccation using a psychrometer (PSY1 Stem Psychrometer, ICT International, Armidale, NSW,  
61 Australia) at 10 minute intervals. The psychrometer was installed on an adjacent leaf rather than the stem, due to the  
62 small stem width of the branchlet. The psychrometer was installed in a similar way as would be used on the stem,  
63 abrading a small area of the leaf cuticle, clamping the psychrometer to the tissue, sealing the instrument against the  
64 surface of the leaf using vacuum grease and insulating the apparatus using packing foam and a cloth (Dixon and Downey,  
65 2013). The temperature in the lab remained between 20 and 23 degrees over the course of the experiment and  
66 temperature changes recorded by the psychrometer were within 0.1 degree between successive measurements  
67 recorded at 10 minute intervals.

68 Leaf image sequences were analysed using an image subtraction method in ImageJ (Rueden *et al.*, 2017) with the Fiji  
69 distribution (Schindelin *et al.*, 2012). To visualise and quantify cavitation, we used the OSOV Toolbox and image  
70 processing methodology (Brodribb *et al.*, 2016b), available at [www.opensourceov.org](http://www.opensourceov.org). Approximately 2000 captured  
71 colour images for each replicate were converted to black and white 8-bit images. Pixel values of consecutive images  
72 were subtracted from each other to reveal changes using the "Image difference" function of the OSOV add in. The  
73 "moments" thresholding mask and the "despeckle" image processing functions were used to reduce background noise  
74 and noise from leaf shrinkage. Given that this noise varied from leaf to leaf, these functions were applied manually such  
75 that only the pixels representing cavitating leaf veins were highlighted. The total number of pixels highlighted on each  
76 image was quantified using the "measure stack" function and the percentage cavitation over time given as the ratio of  
77 the cumulative pixel sum to the total pixels highlighted after cavitation had finished.

78 Hydraulic vulnerability was inferred by combining the  $\Psi_{\text{leaf}}$  as measured by the psychrometer with the OV data (see Data  
79 processing section).  $\Psi_{\text{leaf}}$  change with time was initially rapid but slowed and became linear following stomatal closure  
80 (Brodribb *et al.*, 2016b). Despite the linear nature of  $\Psi_{\text{leaf}}$  decline, a smoothing spline was fitted over the cavitation -  $\Psi_{\text{leaf}}$   
81 data to match timestamps between the psychrometer and the OSOV images using the *smooth.spline()* function from the  
82 stats package in base R (R Core Team, 2019). A technical limitation of these stem psychrometers was that the lowest  
83 measurable  $\Psi_{\text{leaf}}$  was -7 MPa. However, at these levels of water stress, turgor pressure was already lost, and we  
84 assumed the rate of  $\Psi_{\text{leaf}}$  change would not deviate after this point. Therefore, following Brodribb *et al.* (2016a) and  
85 Rodriguez-Dominguez *et al.* (2018), linear regressions were fitted to extrapolate the hydraulic vulnerability of leaves  
86 beyond -7 MPa. P50 was defined as the  $\Psi_{\text{leaf}}$  where 50% of the pixels in the OV images were highlighted. P12 and P88  
87 were calculated in a similar way, at 12% and 88% cavitation area, respectively.

38

### 39 *Pressure-volume (PV) curves*

40 One leaf per branch from each of the same individuals was harvested, hydrated in the dark in the same way as the  
41 whole branches and used to construct pressure-volume relationships using a Scholander pressure chamber (Model  
42 1505D, PMS Instrument Company, Albany, USA) and electronic balance to 5 decimal places. Leaf pressure volume (PV)  
43 curves were generated following Tyree and Hammel (1972). The leaves were excised, immediately weighed and then  
44 periodically weighed and the corresponding  $\Psi_{\text{leaf}}$  measured as the leaf dried under laboratory conditions. A single PV  
45 curve from the four leaves was generated per species for estimation of the turgor loss point (TLP), the bulk elastic  
46 modulus ( $\epsilon$ ) and the osmotic potential at full turgor ( $\Psi_{\text{FT}}$ ). TLP was defined as the water potential at the inflexion point of  
47 the inverse  $\Psi_{\text{leaf}} - \text{RWC}$  relationship and  $\epsilon$  defined as the pre-TLP gradient of the  $\Psi_{\text{leaf}} - \text{RWC}$  relationship.

### 48 *Specific leaf area*

49 Five comparable leaves from the same branch were selected based on similar appearance to the measurement leaf and  
50 photographed on a flat surface for leaf area calculation using the EImage package (Pau *et al.*, 2010) in Rstudio (Team  
51 RStudio, 2015). These leaves were immediately weighed and stored in a 60 °C oven overnight and weighed again to  
52 calculate an average specific leaf area (SLA) for the branch using an electronic balance correct to five decimal places.

### 53 *Data processing and statistical analyses*

54 All data processing and analyses were conducted in Rstudio (Team RStudio, 2015). The mean and standard error were  
55 calculated using Rstatix package (Kassambara, 2020) `get_summary_stats()` function and significantly different groupings  
56 were made using the `LSD.test()` function in the agricolae package (de Mendiburu and de Mendiburu, 2020).  
57 Relationships between climatic and physiological variables were analysed with linear regression using the ggpmisc  
58 package (Aphalo, 2016) and the `stat_poly_eq()` function. Data were visualised using ggplot2 (Villanueva and Chen, 2019).

## 59 **Results**

### 60 *Cavitation progression*

61 Cavitation events in leaf vein networks were visualised for all eight species using the OV method and there was a  
62 common pattern in the progression of cavitation among all leaves. Vein cavitation proceeded in large steps initially due  
63 to multiple failures of midvein and 1<sup>st</sup> order vein conduits, followed by smaller, more gradual cavitation of disparate vein  
64 networks across the mesophyll (Figure 1). For example, *E. atrata* midvein experienced cavitation at  $\Psi_{\text{leaf}}$  of -2.5 MPa  
65 (blue/purple colour in Figure 1) while the smaller veins of this species cavitate at  $\Psi_{\text{leaf}}$  of -6 MPa (yellow in Figure 1).  
66 Cavitation in multiple conduits of the midvein occurred with increasingly negative water potential in the lateral margins

of the midvein in all species and this was particularly evident in *E. grandis* and *E. atrata* (Figure 1). The exception was *E. macrandra* where no midvein cavitation was captured by the OV method. There were visible differences across species in the density of venation structure. Qualitatively, *C. tessellaris* showed cavitation events across a dense, highly reticulated network, while *E. laevopinea* and *E. longifolia* leaves showed fewer cavitation events in lower order veins.

The shape of the hydraulic vulnerability curves within replicates of the same species were reasonably similar (Figure 2). Species that seemed to cavitate over a smaller period of water potentials, such as *C. tessellaris* and *E. grandis*, were particularly tight in their agreement and possessed a sigmoid shape with a steep gradient at the level of P50. Larger differences between individuals were observed in species that exhibited cavitation more gradually, increasing variability in the P50 statistic, such as for *E. laevopinea* and *A. crassifolia*.

#### Variation in hydraulic vulnerability between species

The embolism period, designated by the P12-P88 parameter, was found to vary significantly across species ( $P < 0.05$ ) (Table 2). In some species P12-P88 spanned a narrow range of  $\Psi_{\text{leaf}}$ , such as *C. tessellaris* and *E. grandis* in which P12-P88 were  $0.64 \pm 0.13$  MPa and  $0.7 \pm 0.2$  MPa, respectively. In contrast, this period spanned more than four times that range for other species, for *E. atrata* and *E. macrandra* P12-P88 spanned  $2.9 \pm 0.78$  MPa and  $3.19 \pm 0.49$  MPa, respectively. The P50 threshold was also reached at markedly different  $\Psi_{\text{leaf}}$  across species ( $P < 0.05$ ), ranging from  $-3.48 \pm 0.47$  MPa in *A. crassifolia* to  $-8.25 \pm 0.51$  MPa in *E. macrandra*. Other thresholds of leaf desiccation spanned much smaller ranges of  $\Psi_{\text{leaf}}$  with little variation across species ( $P > 0.05$ ), with  $\Psi_{\text{TLP}}$  spanning a range of 1.1 MPa across all studied species and  $\Psi_{\text{FT}}$  varying by 1.29 MPa across species. The bulk elastic modulus of leaf tissues ( $\epsilon$ ) was lowest for *E. laevopinea* (24.39 MPa) and highest for *E. tereticornis* (43.41 MPa) leaves.

#### Relationships between hydraulic vulnerability, climate and SLA

Whilst diversity in P50 and P12-P88 was observed across species, these traits appeared to be decoupled (linear relationship was not significant) (Figure 3 B). Leaf SLA and MAP had a weak linear relationship ( $P = 0.032$ ,  $R^2 = 0.56$ ) (Figure 3 A). Significant linear relationships existed between P50 and leaf SLA ( $R^2 = 0.75$ ,  $**P < 0.01$ ) but not with the elasticity of leaf tissues ( $\epsilon$ ) for the eight species of eucalypt (Figure 4). When drawing relationships between P50 and climate variables, the P50 was associated linearly with the MAP (mean annual precipitation) of a species' home climate ( $R^2 = 0.64$ ,  $*P = 0.018$ ) but was unrelated to the MAT (mean annual temperature) (Figure 4). P12-P88 also had a strong linear relationship with SLA ( $R^2 = 0.72$ ,  $**P < 0.01$ ), but unlike P50, the linear relationship with MAP was not significant ( $P > 0.05$ ) (Figure 5). In context and generally speaking, leaves of species with more dry mass per unit area and from drier climates of origin reached P50 at more negative  $\Psi_{\text{leaf}}$  and spread cavitation over a greater range of water potentials than thinner leaves from species originating in wetter climates (Figure 4). Despite *E. laevopinea* leaf tissues being almost twice as hydraulically elastic than *C. tessellaris* and from a climate 10 degrees cooler on average, the P50 of the two species were comparable.



19

## 20 Discussion

21 In our study, we measured the timing and spatial spread of cavitation through the leaf vein networks of eight eucalypt  
22 species and analysed how cavitation metrics correlated with climate of origin, leaf physiological and anatomical traits.  
23 Metrics of leaf hydraulic failure such as P50 and P12-P88 varied across species and were linked to specific leaf area and  
24 the annual precipitation at the climate of origin.

### 25 *Leaf cavitation progressed from larger to smaller conduits*

26 Our results on the magnitude, as well as the sequence, of cavitation events in leaf tissue of eucalypts agreed well with  
27 other recent studies on similar species (Li *et al.*, 2019; Creek *et al.*, 2019). Cavitation began at less negative water  
28 potentials in the midveins and progressed to smaller, tertiary veins at increasingly negative water potentials (Li *et al.*,  
29 2019; Scoffoni *et al.*, 2017b; Brodribb *et al.*, 2016a). Although it could be argued that more distal veins would experience  
30 more negative water potentials earlier in the dry-down process and cavitate first, the vulnerability to cavitation of larger  
31 diameter vessels causes failure to occur first in situations where the water supply to the leaf is suddenly interrupted. The  
32 vein networks in leaves from all eucalypt species demonstrated a hierarchical, reticulate network with multiple,  
33 redundant conduits for the distribution of water across the mesophyll (Brodribb *et al.*, 2016b). Under natural conditions,  
34 leaves of evergreen trees, including the eucalypt species in this study, experience cycles of hydraulic decline and  
35 recovery and must be able to maintain and recover mesophyll hydraulic conductivity. Redundancy in the major vein  
36 conduits allows water to circumvent embolisms which may preserve mesophyll tissue for longer and add resilience to  
37 the leaf hydraulic system. Interestingly, *E. macrandra* did not demonstrate cavitation of midvein conduits yet had the  
38 most embolism resistant leaves. It is possible that cavitation did occur here but was not visualised, due in part to poor  
39 transmission of light through the thickest part of these leaves – *E. macrandra* possessed the highest SLA of all the  
40 species studied. Certainly, visible cavitation in the major veins across the rest of the mesophyll in *E. macrandra* leaves  
41 preceded smaller veins, as was the case for other species. A commonly cited criticism of the OV method, although  
42 cheap, easy and non-destructive, is that not all cavitation events may be visible in leaves of all species due to poor  
43 resolution, superimposition of veins and imperfect transmission of light (Scoffoni *et al.*, 2017b). Another limitation is  
44 that incorrect implementation of the method, particularly by incomplete or interrupted image capture, can produce  
45 vulnerability curves that are artificially vulnerable (Gauthey *et al.*, 2020). The sparse appearance of cavitation across leaf  
46 vein networks for two species (*E. longifolia* and *E. laevopinea*) compared with the highly dense networks visible in *C.*  
47 *tessellaris*, may signify cavitation events in some of the smaller veins may not have been captured. However, *Eucalyptus*  
48 species from cooler, wetter climates do tend to have a much lower vein density (Brooker and Nicolle, 2013; de Boer *et*  
49 *al.*, 2016), relying more heavily on outside xylem processes for water transport across the mesophyll. Furthermore,  
50 factors that control vein reticulation patterns in angiosperm leaf venation have been shown to be, in general,  
51 phylogenetically conserved at the genus level (Li *et al.*, 2017). It may be that *C. tessellaris*, the most phylogenetically

32 distinct species in this study (Thornhill *et al.*, 2019), has a progression of cavitation that presents differently using the OV  
33 method.

#### 34 *P50 and P12-P88 metrics were decoupled among species*

35 In our study, P50 and P12-P88 were well-differentiated between species (Table 2), yet surprisingly, the rankings of the  
36 two parameters for these species did not correlate; the species with the lowest P50 did not spread the cavitation events  
37 over the largest range of water potentials (Figure 3 B). For example, *A. crassifolia* was first to lose half the visible  
38 conducting area, yet the cavitation process lasted longer than four other species. The role of P50 as an indicator of  
39 vulnerability to cavitation is well established, whereby leaves of species adapted to more arid conditions lie at the far  
40 end of the hydraulic safety/efficiency trade-off. These leaves have smaller conduit diameters, thicker cell walls, greater  
41 redundancy and low water transport resistance (Trueba *et al.*, 2019; Grossiord *et al.*, 2020). However, the range over  
42 which cavitation occurs, although intuitively a drought resistance trait, may relate more to the drought adaptive strategy  
43 of species, for example, where  $P50_{\text{stem}}$  is combined with leaf stomatal conductance traits to characterise iso/anisohydric  
44 strategies (Skelton *et al.*, 2015). The hydraulic segmentation hypothesis applies to species with leaves that are drought  
45 avoiders – these species shed leaves during drought to reduce the evaporative demand and preserve conduit integrity in  
46 the stem (Pritzkow *et al.*, 2019; Zimmermann, 2013; Pivovarov *et al.*, 2014a). The vein networks in these species may  
47 exhibit behaviour like those in *C. tessellaris* or *E. grandis* (Figure 2), where no damage is visible up to a certain point after  
48 which there is a rapid collapse of the system. In contrast, drought tolerators (Delzon, 2015) are species that retain their  
49 leaves and require the preservation of some conduits over a greater range of water potentials. Mesophyll tissue can  
50 continue to function, albeit with reduced efficiency, when water supply is restored to a partially cavitated leaf (Brodribb  
51 *et al.*, 2016a). We hypothesise that the difference in strategy may be imparted by more (drought avoiders) or less  
52 (drought tolerators) uniform xylem conduit diameter sizes (Sack *et al.*, 2015) across the network, causing air seeding in  
53 vessels to occur over a narrow range of water potentials. This is somewhat visible in our images of cavitation progression  
54 (Figure 1, vessels seem to be roughly uniform in size in *C. tessellaris* but have a range of sizes in *E. atrata*) although was  
55 not quantified in this study.

#### 56 *The hydraulic margin between TLP and P50 highlights plastic versus genetically fixed hydraulic leaf traits in eucalypts*

57 Osmotic adjustment of leaf tissue in response to water deficits is well described in a range of species, including eucalypts  
58 (Blum, 2017; Bartlett *et al.*, 2012). In *Eucalyptus* species, this trait is remarkably flexible and can vary intra-specifically in  
59 response to local climates and temporally across seasons (Merchant *et al.*, 2007). Leaves with higher concentrations of  
60 solutes in the vacuole can maintain leaf turgor despite greater strain on the hydraulic system, resulting in a shift of the  
61 TLP to lower water potentials. Our data agrees well with other common garden experiments in that TLPs are distributed  
62 over a relatively narrow range of water potentials ( $\sim -1.5$  to  $-3.5$  MPa) and may reflect the convergence of osmotic  
63 adjustment among species as leaves optimise to the hydraulic conditions of the common climate (Warren *et al.*, 2006; Li  
64 *et al.*, 2019; Bourne *et al.*, 2017; Li *et al.*, 2018). In contrast, P50 was distributed over a much greater hydraulic range,

L5 suggesting this trait is more genetically fixed via permanent xylem structures during leaf development (Bourne *et al.*,  
L6 2017). The need for a fixed expression of P50 is evidence that for leaves, there are serious consequences for plant  
L7 growth following a loss of hydraulic integrity (Skelton *et al.*, 2017).

L8 A diverse range of Australian species, including eucalypts, appear to maintain stomatal conductance at water statuses  
L9 below TLP; thus, TLP may not be as critical a threshold as P50 for these species (Farrell *et al.*, 2017). Furthermore,  
L10 outside xylem, hydraulic conductance rather than leaf xylem embolism has been shown to be the dominant cause of  
L11 hydraulic decline at water potentials below TLP (Scoffoni *et al.*, 2017c). A large hydraulic margin between TLP and P50,  
L12 such as in *E. macrandra*, suggests that these species are evolutionarily adapted to dry climates but possess a TLP  
L13 matched to relatively mild growing conditions.

#### L14 *Cavitation metrics corresponded to precipitation of home climate and leaf SLA*

L15 Both P50 and P12-P88 correlated linearly with the mean annual precipitation (MAP) in the climate of seed origin. Many  
L16 variations of these and other hydraulic traits characterising plant vulnerability to embolism have been demonstrated  
L17 before in a range of species, including eucalypts. (Sack *et al.*, 2015; Santiago *et al.*, 2018; Pivovarovoff *et al.*, 2014a; Powell  
L18 *et al.*, 2017; Blackman *et al.*, 2012; Blackman *et al.*, 2009; Sack and Scoffoni, 2013; Bourne *et al.*, 2017; Li *et al.*, 2018; Liu  
L19 *et al.*, 2021). A mechanistic understanding of how species adapt to wetter climates by investing less in cavitation  
L20 resistant leaf vein networks is well described by the efficiency-safety hypothesis (Santiago *et al.*, 2018; Pivovarovoff *et al.*,  
L21 2014b); therefore, species adapted to lower rainfall possessing more negative P50 values is to be expected. The fact that  
L22 P12-P88 did not correlate significantly with MAP supports our conclusion that this trait relates to drought strategy. The  
L23 effect of decreasing MAP increasing the range of water potentials over which cavitation occurs gives rise to contrasting  
L24 drought strategies in drought-avoiding leaves versus drought-tolerant leaves and highlights the critical role of resilience  
L25 imparted by constitutive properties under strong genetic control. For *E. atrata*, cavitation events extended over three  
L26 times as large a margin of water potentials than *C. tessellaris*, despite similar home climate MAPs. Neither P50 nor P12-  
L27 P88 seemed to be affected by home climate MAT.

L28 Evidence to suggest that leaf SLA may impart greater resistance to leaf vein cavitation among these eucalypt species was  
L29 also observed (Figures 4 and 5). Low SLAs could increase resistance to cavitation in a number of ways, including more  
L30 cellular layers which hold store water to support and buffer vein structures or greater investment in the xylem itself,  
L31 including thicker xylem walls of vessels and greater vessel numbers per unit leaf area (Jordan *et al.*, 2013; Sack *et al.*,  
L32 2015). In contrast to our results, SLA did not present an advantage to P50 across several tropical tree species  
L33 (Markestijn *et al.*, 2011). However, the eucalypts in this study had leaves with SLAs above these tropical species,  
L34 exhibiting physical properties outside the scope of previous investigations. Furthermore, our data suggests that only  
L35 SLAs below  $\sim 6 \text{ m}^2 \text{ kg}^{-1}$  appear to confer a substantial advantage to extending P50 to lower water potentials among  
L36 eucalypts. The similarity of SLA among species in this study (Table 2) may be the result of the interaction between the  
L37 relatively mesic common garden environment and long-term adaption to a species' home climate. Eucalypt leaves are

typically highly plastic in form, and SLA may be somewhat plastic to suit the current growing environment in the six most mesic species (Brooker and Nicolle, 2013). The leaf morphology of *E. macrandra* and *E. atrata* may be limited in the extent to which investment in hydraulic architecture could match this environment, as these species' home climates lay farthest geographically from the growing environment. SLA and investment in safe hydraulic structures may be a more fixed trait for these species. The significant correlation between longer P12-P88 and lower SLA points to investment in additional dry matter associated with hydraulic architecture (xylem or surrounding cellular structures) as causing more gradual rates of cavitation with declining hydraulic status (Li *et al.*, 2017).

## Conclusion

Our results demonstrate how a detailed analysis of the hydraulic vulnerability of leaf vein networks among related species of eucalypts from contrasting climates can provide new insights into how and when cavitation resistance occurs and which metrics are coupled to home climate versus the growing climate. While P50 is correlated with home climate precipitation, the P12-P88 metric seems more related to drought strategy; more gradual cavitation progression with declining water content is represented by thicker leaves. Furthermore, our results agree with other studies that highlight P50 as a genetically fixed trait, while TLP may be more plastic, as demonstrated by similar TLP across these species grown in a common garden environment. Combining the OV method and vulnerability curves with other technologies, such as micro CT, have yielded a more detailed understanding of the still unresolved details of cavitation progression and recovery (Gauthey *et al.*, 2020; Scoffoni *et al.*, 2017b). Although we demonstrated a relationship with SLA and metrics of cavitation resistance, a better understanding of the underlying leaf anatomical structures between species that modulate P50 and P12-P88 could be achieved in future work using microscopy (Scoffoni *et al.*, 2017b; Li *et al.*, 2017). Similarly, applying the OV technique to a greater range of eucalypt species may further validate the trends shown in this study, particularly more species native to areas outside the high rainfall environments of south-eastern Australia.

## References

- Aphalo, P. J. (2016). *ggpmisc*: An R package.
- Bartlett, M. K., Scoffoni, C. & Sack, L. (2012). The determinants of leaf turgor loss point and prediction of drought tolerance of species and biomes: a global meta-analysis. *Ecology Letters* 15(5): 393-405.
- Blackman, C. J., Aspinwall, M. J., Tissue, D. T. & Rymer, P. D. (2017). Genetic adaptation and phenotypic plasticity contribute to greater leaf hydraulic tolerance in response to drought in warmer climates. *Tree Physiology* 37(5): 583-592.
- Blackman, C. J., Brodribb, T. J. & Jordan, G. J. (2009). Leaf hydraulics and drought stress: response, recovery and survivorship in four woody temperate plant species. *Plant, Cell & Environment* 32(11): 1584-1595.
- Blackman, C. J., Brodribb, T. J. & Jordan, G. J. (2012). Leaf hydraulic vulnerability influences species' bioclimatic limits in a diverse group of woody angiosperms. *Oecologia* 168(1): 1-10.
- Blum, A. (2017). Osmotic adjustment is a prime drought stress adaptive engine in support of plant production. *Plant, Cell & Environment* 40(1): 4-10.

- 34 Bourne, A. E., Creek, D., Peters, J. M. R., Ellsworth, D. S. & Choat, B. (2017). Species climate range influences hydraulic  
35 and stomatal traits in Eucalyptus species. *Annals of Botany* 120(1): 123-133.
- 36 Brodribb, T. J., Bienaimé, D. & Marmottant, P. (2016a). Revealing catastrophic failure of leaf networks under stress.  
37 *Proceedings of the National Academy of Sciences of the United States of America* 113(17): 4865-4869.
- 38 Brodribb, T. J., Skelton, R. P., McAdam, S. A., Bienaimé, D., Lucani, C. J. & Marmottant, P. (2016b). Visual quantification  
39 of embolism reveals leaf vulnerability to hydraulic failure. *New Phytologist* 209(4): 1403-1409.
- 40 Brooker, I. & Nicolle, D. (2013). *Atlas of leaf venation and oil gland patterns in the eucalypts*. Csiro publishing.
- 41 Choat, B., Brodribb, T. J., Brodersen, C. R., Duursma, R. A., López, R. & Medlyn, B. E. (2018). Triggers of tree mortality  
42 under drought. *Nature* 558(7711): 531-539.
- 43 Creek, D., Lamarque, L. J., Torres-Ruiz, J. M., Parise, C., Burrell, R., Tissue, D. T. & Delzon, S. (2019). Xylem embolism in  
44 leaves does not occur with open stomata: evidence from direct observations using the optical visualization  
45 technique. *Journal of Experimental Botany* 71(3): 1151-1159.
- 46 de Boer, H. J., Drake, P. L., Wendt, E., Price, C. A., Schulze, E.-D., Turner, N. C., Nicolle, D. & Veneklaas, E. J. (2016).  
47 Apparent Overinvestment in Leaf Venation Relaxes Leaf Morphological Constraints on Photosynthesis in Arid  
48 Habitats *Plant Physiology* 172(4): 2286-2299.
- 49 de Mendiburu, F. & de Mendiburu, M. F. (2020). Package 'agricolae'. *R package version: 1.2-8*.
- 50 Delzon, S. (2015). New insight into leaf drought tolerance. *Functional Ecology* 29(10): 1247-1249.
- 51 Dixon, M. & Downey, A. (2013). PSY1 Stem Psychrometer manual. *ICT International [online]*.
- 52 Farrell, C., Szota, C. & Arndt, S. K. (2017). Does the turgor loss point characterize drought response in dryland plants?  
53 *Plant, Cell & Environment* 40(8): 1500-1511.
- 54 Gauthey, A., Peters, J. M. R., Carins-Murphy, M. R., Rodriguez-Dominguez, C. M., Li, X., Delzon, S., King, A., López, R.,  
55 Medlyn, B. E., Tissue, D. T., Brodribb, T. J. & Choat, B. (2020). Visual and hydraulic techniques produce similar  
56 estimates of cavitation resistance in woody species. *New Phytologist* 228(3): 884-897.
- 57 Grossiord, C., Ulrich, D. E. & Vilagrosa, A. (2020). Controls of the hydraulic safety–efficiency trade-off. *Tree Physiology*  
58 40(5): 573-576.
- 59 Hartmann, H., Moura, C. F., Anderegg, W. R. L., Ruehr, N. K., Salmon, Y., Allen, C. D., Arndt, S. K., Breshears, D. D., Davi,  
60 H., Galbraith, D., Ruthrof, K. X., Wunder, J., Adams, H. D., Bloemen, J., Cailleret, M., Cobb, R., Gessler, A., Grams,  
61 T. E. E., Jansen, S., Kautz, M., Lloret, F. & O'Brien, M. (2018). Research frontiers for improving our understanding  
62 of drought-induced tree and forest mortality. *New Phytologist* 218(1): 15-28.
- 63 Johnson, D. M., Berry, Z. C., Baker, K. V., Smith, D. D., McCulloh, K. A. & Domec, J.-C. (2018). Leaf hydraulic parameters  
64 are more plastic in species that experience a wider range of leaf water potentials. *Functional Ecology* 32(4): 894-  
65 903.
- 66 Johnson, D. M., Meinzer, F. C., Woodruff, D. R. & Mcculloh, K. A. (2009). Leaf xylem embolism, detected acoustically and  
67 by cryo-SEM, corresponds to decreases in leaf hydraulic conductance in four evergreen species. *Plant, Cell &*  
68 *Environment* 32(7): 828-836.
- 69 Jordan, G. J., Brodribb, T. J., Blackman, C. J. & Weston, P. H. (2013). Climate drives vein anatomy in Proteaceae. *American*  
70 *journal of botany* 100(8): 1483-1493.
- 71 Kassambara, A. (2020). rstatix: Pipe-friendly framework for basic statistical tests. *R package version 0.6. 0*.
- 72 Klein, T., Zeppel, M., Anderegg, W., Bloemen, J., De Kauwe, M., Hudson, P., Ruehr, N., Powell, T., von Arx, G. & Nardini,  
73 A. (2018). Xylem embolism refilling and resilience against drought-induced mortality in woody plants: processes  
74 and trade-offs. *Ecological Research*.
- 75 Li, L., Ma, Z., Niinemets, Ü. & Guo, D. (2017). Three Key Sub-leaf Modules and the Diversity of Leaf Designs. *Frontiers in*  
76 *Plant Science* 8(1542).
- 77 Li, X., Blackman, C. J., Choat, B., Duursma, R. A., Rymer, P. D., Medlyn, B. E. & Tissue, D. T. (2018). Tree hydraulic traits  
78 are coordinated and strongly linked to climate-of-origin across a rainfall gradient. *Plant, Cell & Environment*  
79 41(3): 646-660.
- 80 Li, X., Blackman, C. J., Peters, J. M. R., Choat, B., Rymer, P. D., Medlyn, B. E. & Tissue, D. T. (2019). More than  
81 iso/anisohdry: Hydroscares integrate plant water use and drought tolerance traits in 10 eucalypt species from  
82 contrasting climates. *Functional Ecology* 33(6): 1035-1049.
- 83 Liu, H., Ye, Q., Gleason, S. M., He, P. & Yin, D. (2021). Weak tradeoff between xylem hydraulic efficiency and safety:  
84 climatic seasonality matters. *New Phytologist* 229(3): 1440-1452.

- 35 Markesteijn, L., Poorter, L., Paz, H., Sack, L. & Bongers, F. (2011). Ecological differentiation in xylem cavitation resistance  
36 is associated with stem and leaf structural traits. *Plant, Cell & Environment* 34(1): 137-148.
- 37 Merchant, A., Callister, A., Arndt, S., Tausz, M. & Adams, M. (2007). Contrasting physiological responses of six Eucalyptus  
38 species to water deficit. *Annals of Botany* 100(7): 1507-1515.
- 39 Pau, G., Fuchs, F., Sklyar, O., Boutros, M. & Huber, W. (2010). EImage—an R package for image processing with  
40 applications to cellular phenotypes. *Bioinformatics* 26(7): 979-981.
- 41 Pivovarov, A. L., Sack, L. & Santiago, L. S. (2014a). Coordination of stem and leaf hydraulic conductance in southern C  
42 alifornia shrubs: a test of the hydraulic segmentation hypothesis. *New Phytologist* 203(3): 842-850.
- 43 Pivovarov, A. L., Sack, L. & Santiago, L. S. (2014b). Coordination of stem and leaf hydraulic conductance in southern  
44 California shrubs: a test of the hydraulic segmentation hypothesis. *New Phytologist* 203(3): 842-850.
- 45 Powell, T. L., Wheeler, J. K., de Oliveira, A. A. R., da Costa, A. C. L., Saleska, S. R., Meir, P. & Moorcroft, P. R. (2017).  
46 Differences in xylem and leaf hydraulic traits explain differences in drought tolerance among mature Amazon  
47 rainforest trees. *Global Change Biology* 23(10): 4280-4293.
- 48 Pritzkow, C., Williamson, V., Szota, C., Trouvé, R. & Arndt, S. K. (2019). Phenotypic plasticity and genetic adaptation of  
49 functional traits influences intra-specific variation in hydraulic efficiency and safety. *Tree Physiology* 40(2): 215-  
50 229.
- 51 R Core Team (2019). R: A language and environment for statistical computing. In *R Foundation for Statistical Computing*,  
52 Vol. 2020 Vienna, Austria.
- 53 Rodriguez-Dominguez, C. M., Carins Murphy, M. R., Lucani, C. & Brodribb, T. J. (2018). Mapping xylem failure in  
54 disparate organs of whole plants reveals extreme resistance in olive roots. *New Phytologist* 218(3): 1025-1035.
- 55 Rueden, C. T., Schindelin, J., Hiner, M. C., DeZonia, B. E., Walter, A. E., Arena, E. T. & Eliceiri, K. W. (2017). ImageJ2:  
56 ImageJ for the next generation of scientific image data. *BMC bioinformatics* 18(1): 529.
- 57 Sack, L. & Holbrook, N. M. (2006). Leaf Hydraulics. *Annual review of plant biology* 57(1): 361-381.
- 58 Sack, L. & Scoffoni, C. (2013). Leaf venation: structure, function, development, evolution, ecology and applications in the  
59 past, present and future. *New Phytologist* 198(4): 983-1000.
- 60 Sack, L., Scoffoni, C., Johnson, D. M., Buckley, T. N. & Brodribb, T. J. (2015). The Anatomical Determinants of Leaf  
61 Hydraulic Function. In *Functional and Ecological Xylem Anatomy*, 255-271 (Ed U. Hacke). Cham: Springer  
62 International Publishing.
- 63 Santiago, L. S., De Guzman, M. E., Baraloto, C., Vogenberg, J. E., Brodie, M., Hérault, B., Fortunel, C. & Bonal, D. (2018).  
64 Coordination and trade-offs among hydraulic safety, efficiency and drought avoidance traits in Amazonian  
65 rainforest canopy tree species. *New Phytologist* 218(3): 1015-1024.
- 66 Schindelin, J., Arganda-Carreras, I., Frise, E., Kaynig, V., Longair, M., Pietzsch, T., Preibisch, S., Rueden, C., Saalfeld, S. &  
67 Schmid, B. (2012). Fiji: an open-source platform for biological-image analysis. *Nature methods* 9(7): 676-682.
- 68 Scoffoni, C., Albuquerque, C., Brodersen, C. R., Townes, S. V., John, G. P., Bartlett, M. K., Buckley, T. N., McElrone, A. J. &  
69 Sack, L. (2017a). Outside-Xylem Vulnerability, Not Xylem Embolism, Controls Leaf Hydraulic Decline during  
70 Dehydration. *Plant Physiology* 173(2): 1197-1210.
- 71 Scoffoni, C., Albuquerque, C., Brodersen, C. R., Townes, S. V., John, G. P., Cochard, H., Buckley, T. N., McElrone, A. J. &  
72 Sack, L. (2017b). Leaf vein xylem conduit diameter influences susceptibility to embolism and hydraulic decline.  
73 *New Phytologist* 213(3): 1076-1092.
- 74 Scoffoni, C., Albuquerque, C., Cochard, H., Buckley, T. N., Fletcher, L. R., Caringella, M. A., Bartlett, M., Brodersen, C. R.,  
75 Jansen, S., McElrone, A. J. & Sack, L. (2018). The Causes of Leaf Hydraulic Vulnerability and Its Influence on Gas  
76 Exchange in *Arabidopsis thaliana*. *Plant Physiology* 178(4): 1584.
- 77 Scoffoni, C., Sack, L. & Ort, D. (2017c). The causes and consequences of leaf hydraulic decline with dehydration. *Journal*  
78 *of Experimental Botany* 68(16): 4479-4496.
- 79 Skelton, R. P., Brodribb, T. J., McAdam, S. A. M. & Mitchell, P. J. (2017). Gas exchange recovery following natural drought  
80 is rapid unless limited by loss of leaf hydraulic conductance: evidence from an evergreen woodland. *New*  
81 *Phytologist* 215(4): 1399-1412.
- 82 Skelton, R. P., West, A. G. & Dawson, T. E. (2015). Predicting plant vulnerability to drought in biodiverse regions using  
83 functional traits. *Proceedings of the National Academy of Sciences* 112(18): 5744-5749.
- 84 Team RStudio (2015). RStudio: integrated development for R. *RStudio Inc., Boston, MA* 42: 14.

- 35 Thornhill, A. H., Crisp, M. D., Külheim, C., Lam, K. E., Nelson, L. A., Yeates, D. K. & Miller, J. T. (2019). A dated molecular  
36 perspective of eucalypt taxonomy, evolution and diversification. *Australian Systematic Botany* 32(1): 29-48.
- 37 Trueba, S., Pan, R., Scoffoni, C., John, G. P., Davis, S. D. & Sack, L. (2019). Thresholds for leaf damage due to dehydration:  
38 declines of hydraulic function, stomatal conductance and cellular integrity precede those for photochemistry.  
39 *New Phytologist* 223(1): 134-149.
- 30 Venturas, M. D., Sperry, J. S. & Hacke, U. G. (2017). Plant xylem hydraulics: what we understand, current research, and  
31 future challenges. *Journal of Integrative Plant Biology* 59(6): 356-389.
- 32 Villanueva, R. A. M. & Chen, Z. J. (2019). *ggplot2: Elegant graphics for data analysis*. Taylor & Francis.
- 33 Warren, C., Dreyer, E., Tausz, M. & Adams, M. (2006). Ecotype adaptation and acclimation of leaf traits to rainfall in 29  
34 species of 16-year-old Eucalyptus at two common gardens. *Functional Ecology* 20(6): 929-940.
- 35 Zhu, S. D., Liu, H., Xu, Q. Y., Cao, K. F. & Ye, Q. (2016). Are leaves more vulnerable to cavitation than branches?  
36 *Functional Ecology* 30(11): 1740-1744.
- 37 Zimmermann, M. H. (2013). *Xylem structure and the ascent of sap*. Springer Science & Business Media.

38

39

## Table Titles

**Table 1.** Summary of species taxonomy, short description of the section distribution, location of seed collection locations, mean annual temperature (MAT), mean annual precipitation (MAP) and mean annual relative humidity (MA.RH) of seed collection locations.

**Table 2.** Physiological characteristics and hydraulic vulnerability characteristics for eight eucalypt species. Error ranges are the standard error and groupings are LSD test where significant differences existed between species. MAP: mean annual precipitation, MAT: mean annual temperature, MA.RH: mean annual relative humidity at 3 pm, SLA: specific leaf area,  $\Psi_{TLP}$ : water potential at turgor loss,  $\Psi_{FT}$ : water potential at full turgor,  $\epsilon$ : bulk elastic modulus, P50: water potential at 50% cavitation, P12-P88: range of water potentials at which cavitation occurred.

## Figure Legends

**Figure 1.** Colour coded cavitation events per 0.1 MPa of leaf water potential for eight species of eucalypt. Colours represent a continuous scale from -1.5 to -10.5 MPa bulk leaf water potential. Images are one representative leaf from each species.

**Figure 2.** Leaf hydraulic vulnerability curves for eight species of eucalypt. Coloured lines represent the cumulative percentage loss of leaf xylem conductivity due to cavitation over increasingly negative bulk leaf water potential. Dotted lines represent the mean water potential at which 50% of visible cavitation occurred (P50), shaded areas indicate the se. n = 4 for *A. crassifolia* and *C. tessellaris*, n = 3 for other species.

**Figure 3.** Relationships of leaf SLA and Mean Annual Precipitation (A) and two metrics of cavitation P50 and P12-P88 (B) of eight species of eucalypt. n = 4 for *A. crassifolia* and *C. tessellaris*, n = 3 for other species.

**Figure 4.** Relationships of P50 with leaf physiological variables of SLA (A), Bulk elastic modulus (B) and home climatic variables of precipitation (C) and temperature (D) of eight species of eucalypt. n = 4 for *A. crassifolia* and *C. tessellaris*, n = 3 for other species.

**Figure 5.** Relationships of P12-P88 with leaf physiological variables of SLA (A), Bulk elastic modulus (B) and home climatic variables of precipitation (C) and temperature (D) of eight species of eucalypt. n = 4 for *A. crassifolia* and *C. tessellaris*, n = 3 for other species

## Tables

### Table 1



| Species                        | Subgenus      | Section (No. Species) | Common name groupings    | Section Climate Range                                                                                                                                                                                           | Coordinates                 | MAP (mm) | MAT (°C) | MA.RH (%) |
|--------------------------------|---------------|-----------------------|--------------------------|-----------------------------------------------------------------------------------------------------------------------------------------------------------------------------------------------------------------|-----------------------------|----------|----------|-----------|
| <i>Angophora crassifolia</i>   | Angophora     | Angophora (10)        | Apples                   | East coast of Aus extending from cooler high rainfall regions to warmer, semiarid inland SQL                                                                                                                    | 33°42'34" S<br>151°11'34" E | 1233     | 17.5     | 72.04     |
| <i>Corymbia tessellaris</i>    | Blakella      | Abbreviatae (19)      | Paper-fruited bloodwoods | Absent from the winter rainfall areas but show a wide tolerance in tropical and subtropical regions                                                                                                             | 16°47' S<br>145°20' E       | 981      | 23.5     | 68.94     |
| <i>Eucalyptus atrata</i>       | Symphyomyrtus | Adnataria (106)       | Boxes and Ironbarks      | Widely distributed outside truly arid regions in areas of moderate to high rainfall                                                                                                                             | 17°29'13" S<br>145°16'14" E | 881      | 21.1     | 67.5      |
| <i>Eucalyptus caesia</i>       | Symphyomyrtus | Bisectae (126)        | Mallees and Mallets      | See <i>E. macrandra</i> . Exclusive occurrence of this species on isolated granite rocks in semi arid regions of WA                                                                                             | 13°19'22" S<br>118°57'11" E | 350      | 18.2     | 57.21     |
| <i>Eucalyptus grandis</i>      | Symphyomyrtus | Latoangulatae (22)    | Mahoganies               | Confined to the coastal strip of E Aus to PNG in high rainfall areas                                                                                                                                            | 26°57' S<br>152°52' E       | 1335     | 20       | 69.71     |
| <i>Eucalyptus laevopinea</i>   | Eucalyptus    | Eucalyptus (99)       | Stringybarks             | Species of cool, moist climates. Annual rainfall 100–1500 distributed throughout the year                                                                                                                       | 31°45' S<br>149°59' E       | 904      | 13.2     | 71.03     |
| <i>Eucalyptus longifolia</i>   | Symphyomyrtus | Incognitae (3)        |                          | Central and southern coastal forests of NSW, not closely related to any other species in the genus                                                                                                              | 33°56' S<br>151°00' E       | 900      | 17.7     | 70.15     |
| <i>Eucalyptus macrandra</i>    | Symphyomyrtus | Bisectae (126)        | Mallees and Mallets      | Centre of section speciation is in SW WA in mediterranean to semiarid climates                                                                                                                                  | 34°26'24" S<br>118°48'38" E | 503      | 16.2     | 72.47     |
| <i>Eucalyptus tereticornis</i> | Symphyomyrtus | Exsertaria (45)       | Eastern Redgums          | Has the most extensive latitudinal distribution of the genus, extending from coastal south-eastern Victoria to southern Papua New Guinea. In drier areas, prefers alluvial flats subject to occasional flooding | 33°59'18" S<br>150°33'03" E | 852      | 15.7     | 68.75     |

32 **Table 2**

33

| <b>Species</b>         | <b>SLA<br/>(m<sup>2</sup> kg<sup>-1</sup>)</b> | <b>Ψ<sub>TLP</sub><br/>(Mpa)</b> | <b>Ψ<sub>FT</sub><br/>(Mpa)</b> | <b>ε<br/>(Mpa)</b> | <b>P50<br/>(Mpa)</b> | <b>P12-P88<br/>(Mpa)</b> |
|------------------------|------------------------------------------------|----------------------------------|---------------------------------|--------------------|----------------------|--------------------------|
| <i>A. crassifolia</i>  | 6.05 ± 0.41 ab                                 | -2.74                            | -2.65                           | 25.03              | -3.48 ± 0.47 a       | 1.86 ± 0.57 bc           |
| <i>C. tessellaris</i>  | 7.04 ± 0.61 a                                  | -2.39                            | -1.93                           | 43.3               | -4.48 ± 0.074 abc    | 0.64 ± 0.13 de           |
| <i>E. atrata</i>       | 4.72 ± 0.88 ab                                 | -1.61                            | -1.36                           | 24.67              | -5.54 ± 0.23 c       | 2.9 ± 0.78 ab            |
| <i>E. grandis</i>      | 6.5 ± 0.89 ab                                  | -2.11                            | -1.8                            | 31.51              | -4.67 ± 0.045 abc    | 0.7 ± 0.20 cde           |
| <i>E. laevopinea</i>   | 5.95 ± 0.46 ab                                 | -2.38                            | -2.05                           | 24.39              | -4.98 ± 0.96 bc      | 1.75 ± 0.054 bcd         |
| <i>E. longifolia</i>   | 6.48 ± 0.67 ab                                 | -2.36                            | -2.3                            | 25.22              | -3.82 ± 0.55 ab      | 2.11 ± 0.29 ab           |
| <i>E. macrandra</i>    | 3.74 ± 0.15 b                                  | -2.66                            | -2.64                           | 36.55              | -8.25 ± 0.51 d       | 3.19 ± 0.49 a            |
| <i>E. tereticornis</i> | 6.37 ± 0.94 ab                                 | -2.63                            | -2.4                            | 43.41              | -3.5 ± 0.32 a        | 0.49 ± 0.27 e            |

34

35

36 **Figures**

37 **Figure 1**

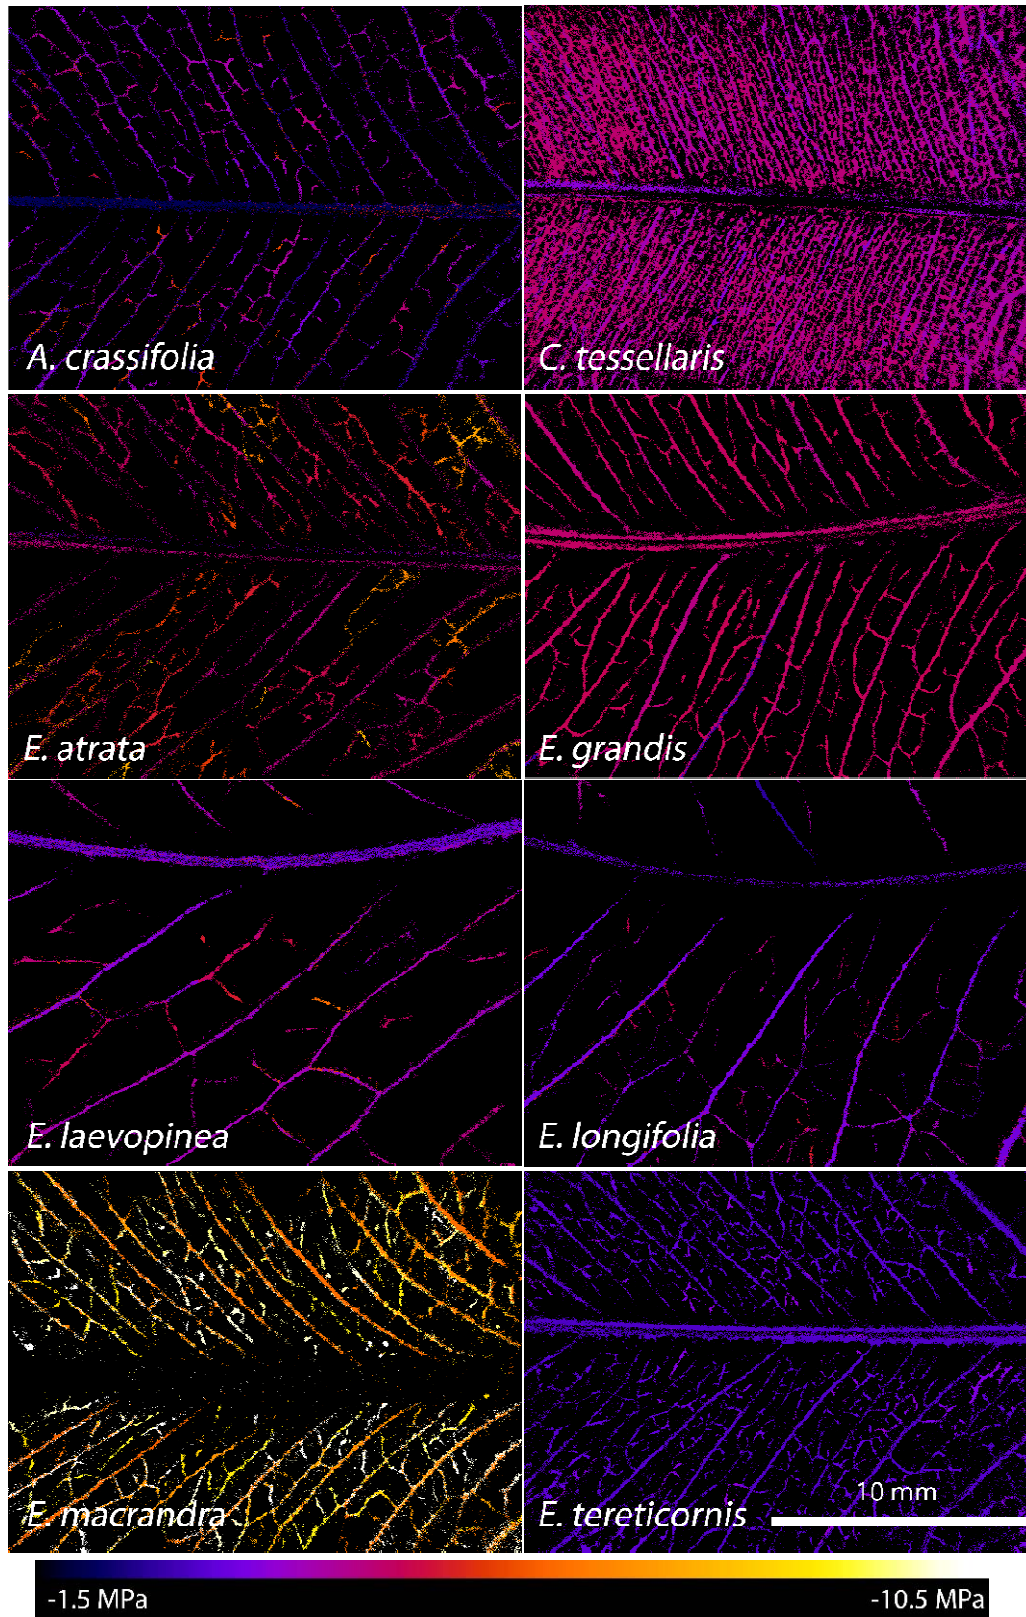

38

39 Figure 2

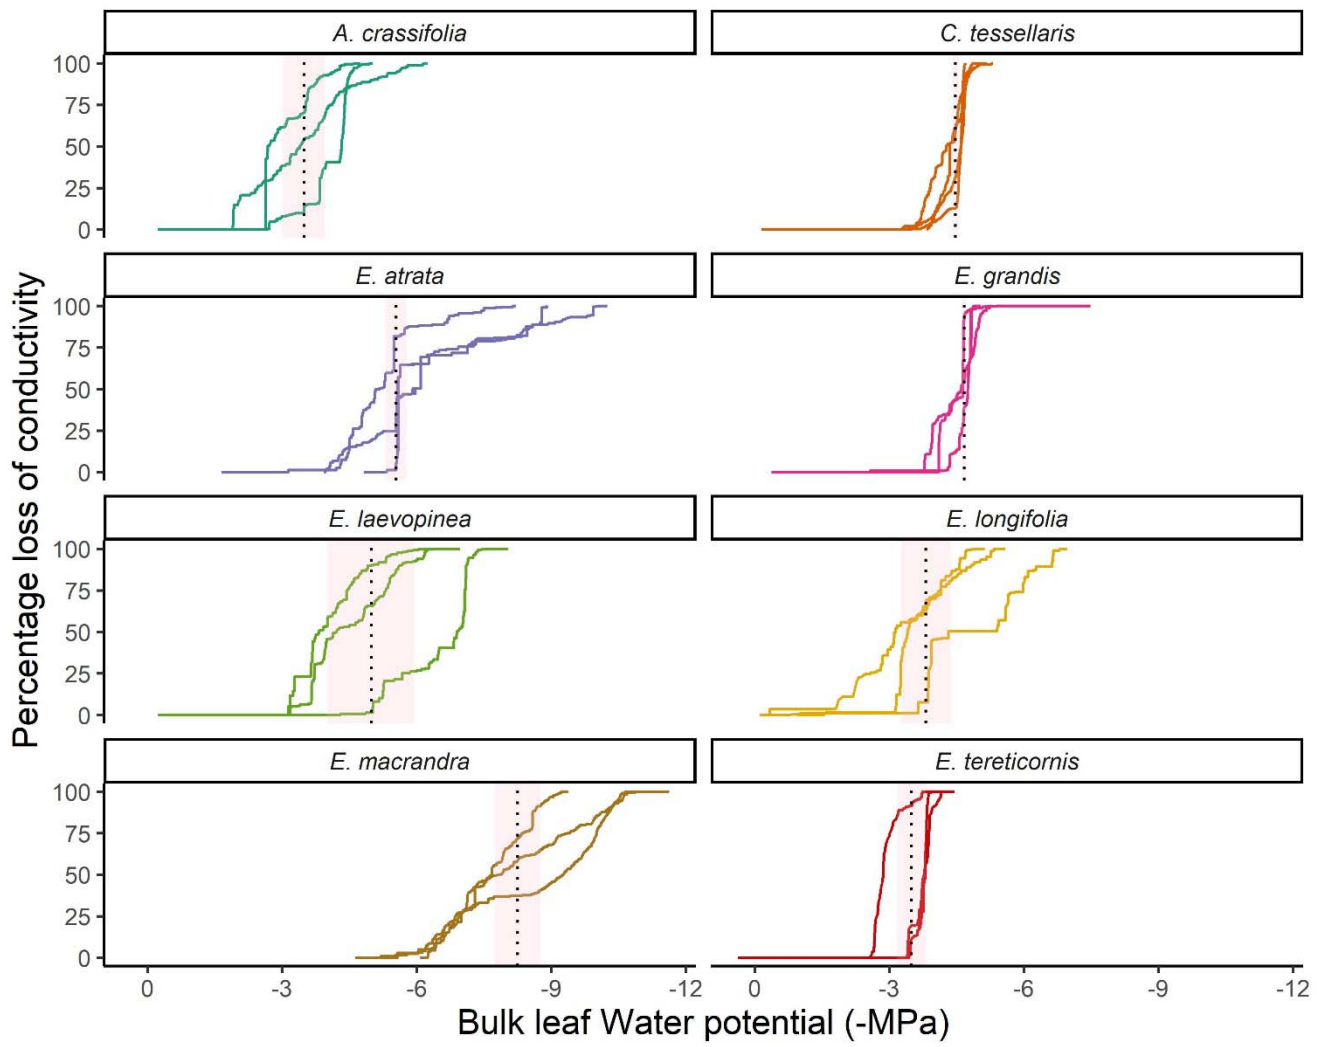

40

41

12 **Figure 3**

13

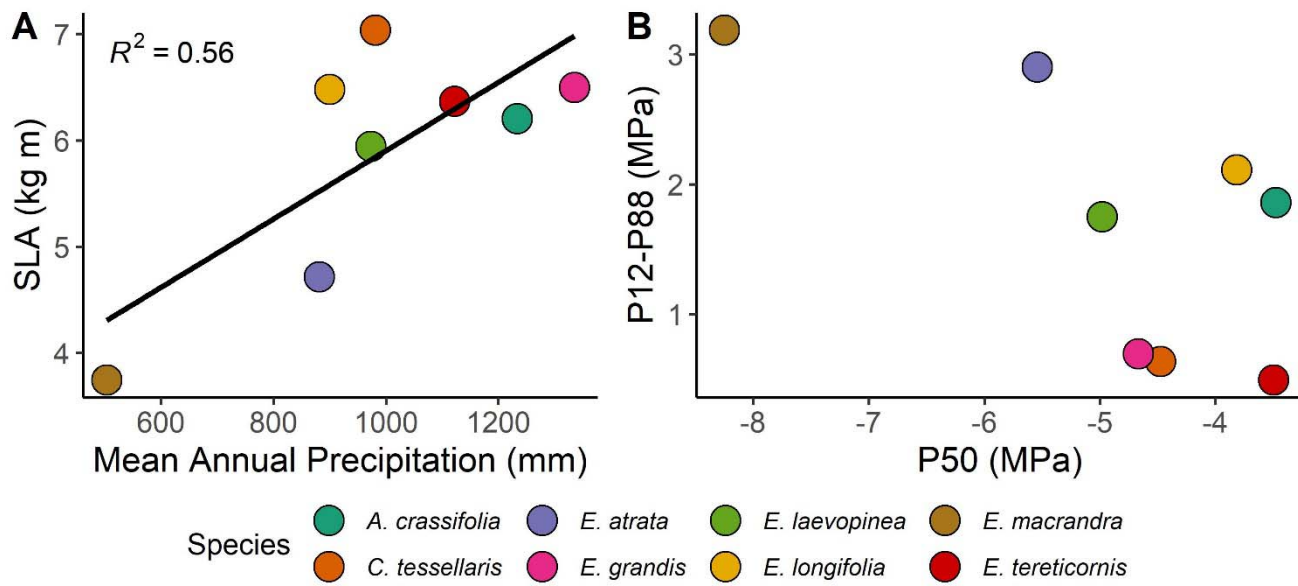

14

15 **Figure 4**

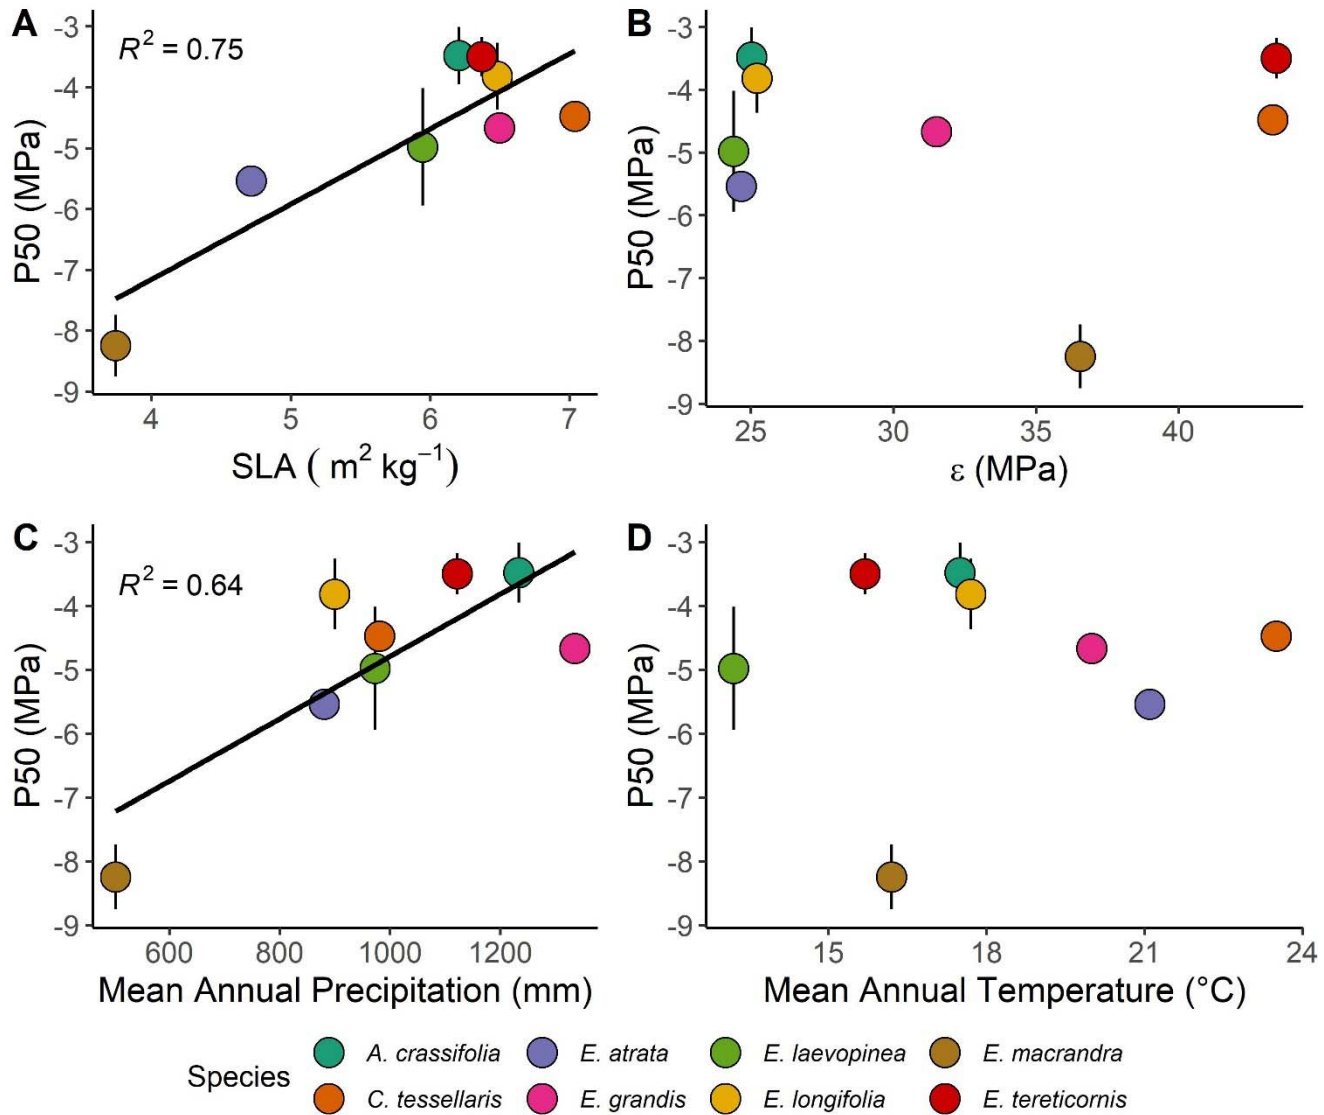

16

17

18 **Figure 5**

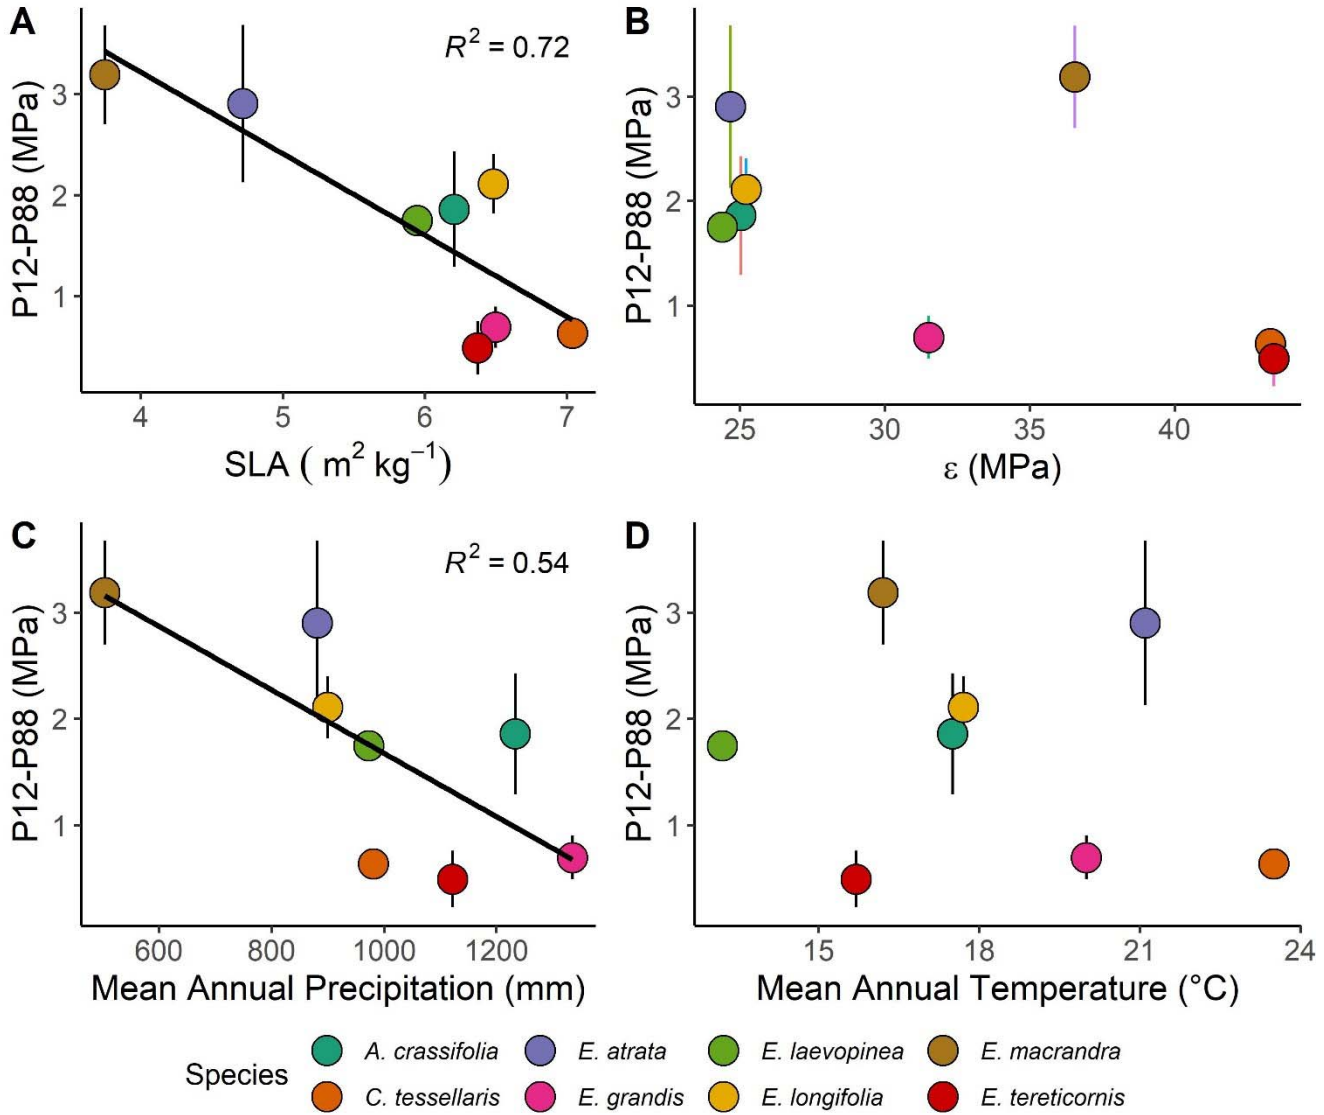

49

50



51 **Supplementary Figure 1.**

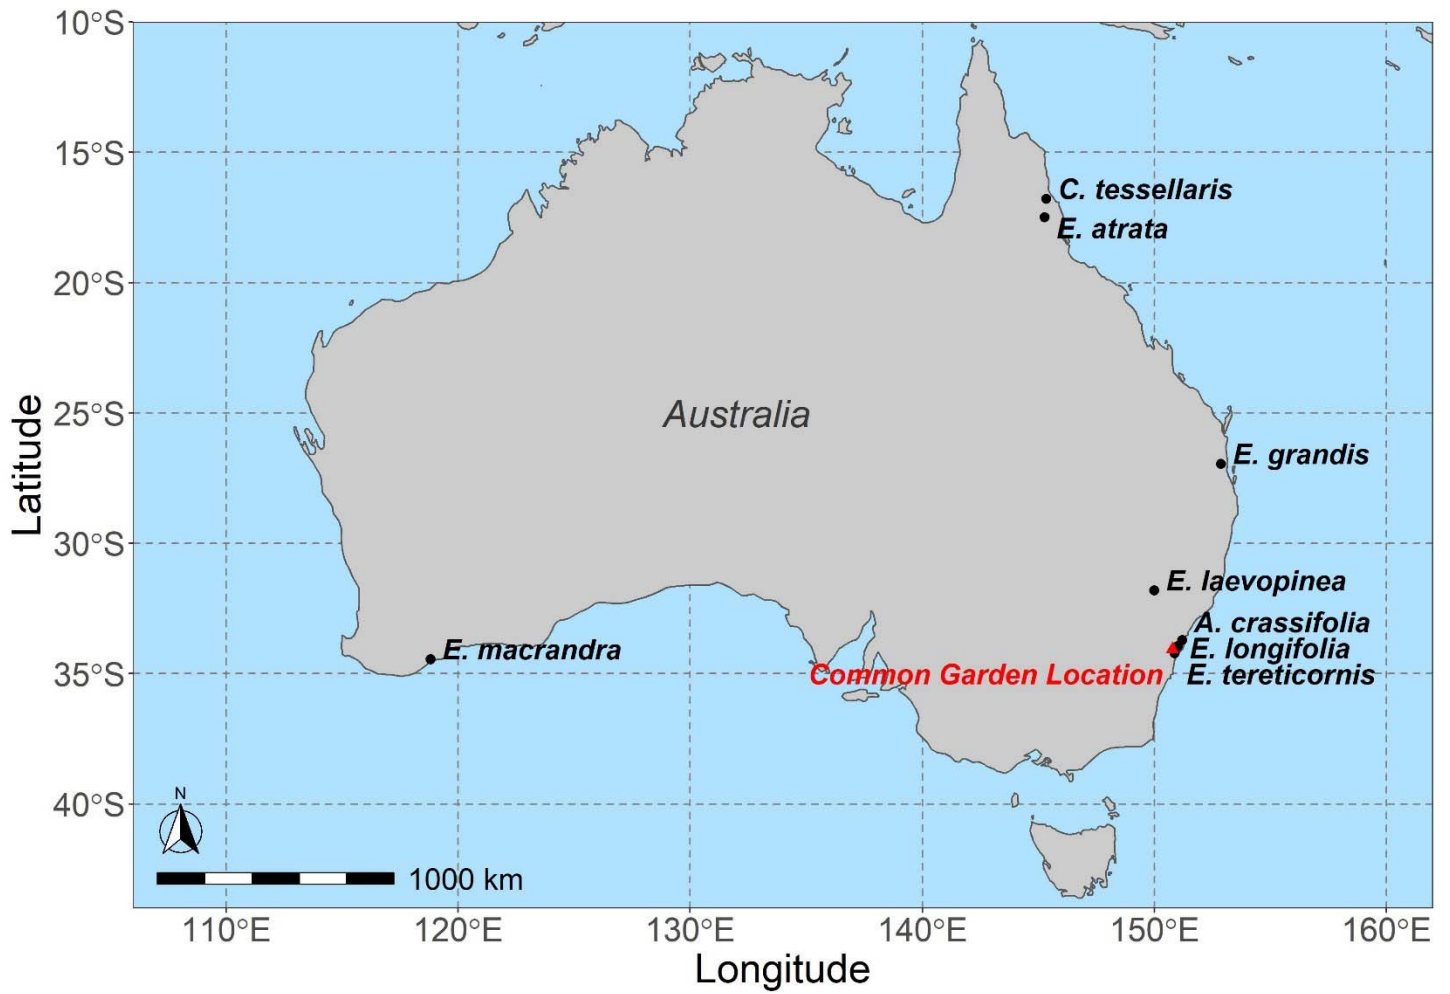

52

53 **Supp. Figure 1.**

54 Map of seed collection locations for eight species of Eucalyptus from across Australia (See Table 1 for coordinates).
